# Supplementary material
Source: Springer Nature journal article supplement (https://www.springermedizin.de/resource/supplementary/13012_2010_284_MOESM1_ESM.pdf/9629634)
Supplement: MOESM1 [file 9629634]

## **Key components of care management interventions [10]:**

- Identification of patients most likely to benefit
- Assessment of individual care needs
- Development of an individual care plan together with patient
- Patient/care-giver education about disease and its management
- Monitoring of how patient is doing over time
- Revision of the care plan if needed
